# Supplementary material
Source: publisher figshare collection journal article supplement (https://gsapubs.figshare.com/ndownloader/files/23201312)
Supplement: Supplementary file 1 [file 23201312]

## Sheet: TableS1
	TABLE S1. RESULTS FOR MODERN BRACHIOPOD SPECIMENS
	Sample Type	Sample name	Order	Suborder	Species	Depth	Depth Used*		Location			δ7Li		[Ca]		Fe/Ca	Mg/Ca	Sr/Ca		Li/Ca	Al/Ca	Mn/Ca		Temperature	Salinity	[DIC]	pH	Location Name
						(m)	(m)		Lat	Long		(‰)		(mol/kg)		(mmol/kg)				(μmol/mol)				(°C)		(μmol/kg)
									(°N)	(°W)
	Bulk Shell
			Craniida
		M34			Novocrania turbinata	123	125		37.5	137		24.1917		4.72638		0.18202	104.256	2.732		37.7123	639.51	2051.6		11.167	34.997	2084.7	7.98437	Soyo-Maru St. 575
			Rhynchonellida
		M23			Frieleia halli	N.A.†	30		36.8007	-121.947		27.0922		10.3855		0.0366138	5.93633	1.08797		42.8725	96.271	3.19015		12.263	33.368	2036.8	7.86666	Monterey Co., CA, USA
		M14			Notosaria nigricans	176.784	150		-40.65	172.82		25.3947		12.996		0.0992161	12.7365	1.39114		46.4614	119.004	1.32658		13.283	35.235	2007.3	8.12502	Golden Bay, Nelson, NZ
		M28			Hemithiris psittacea	N.A.	75		56.8	-132.96		27.373		11.9575		0.0143427	3.96498	1.26578		44.1113	49.0464	6.02515		6.339	32.534	2076.6	7.64186	Petersburg, Alaska
		M31			Hemithiris psittacea	N.A.	100		57.1	-134.12		25.7068		5.37199		0.0469406	4.95914	1.23338		46.8325	154.956	20.6062		6.174	32.712	2074.3	7.78808	Frederic Sound, Alaska
			Terebratulida
				Terebratellidina
		M18			Calloria inconspicua	N.A.	100		-36.5	173.5		28.4007		5.65267		0.0058584	8.23289	1.15819		35.3434	18.0116	8.46227		15.209	35.31	2042.2	8.10832	New Zealand
		M32			Calloria inconspicua	N.A.	100		-36.8	174.8		28.7758		5.80867		0.0102774	9.59083	1.1926		36.1472	34.1776	14.7195		15.209	35.31	2065.2	8.08115	Rangitoto, NZ
		M07			Campages mariae	115	100		36	134.5		26.626		9.29833		0.0130901	9.79158	1.16648		38.4956	106.297	46.1117		12.368	34.305	2111.9	7.94861	Hukui-maru St. 3
		M09			Coptothyris grayi	N.A.	30		40.8	140.75		27.393		9.45356		bdl§	0.704213	1.23915		29.2559	9.89036	6.28527		11.583	34.005	2040.1	7.88429	Mutsu Bay, Aomari Pref., Japan
		M09 dup			Coptothyris grayi	N.A.	30		40.8	140.75		27.2085		5.95854		0.0275169	8.41954	1.22398		35.1544	31.5765	7.17295		11.583	34.005	2040.1	7.88429	Mutsu Bay, Aomari Pref., Japan
		M27			Dallinella occidentalis	65 to 75	75		33.26	-118.5		26.598		5.69617		0.0412211	8.54188	1.19231		34.0274	169.508	10.0542		10.292	33.584	2077.1	7.81681	Dredged off Catalina Island, CA
		M17			Frenulina sanguinolenta	N.A.	50		21.6	-158.11		24.8221		9.08114		0.0154867	15.283	1.14722		21.8969	144.821	14.4067		24.695	34.997	1918.5	8.05939	Haleiwa, Oahu, Hawaii
		M24			Frenulina sanguinolenta	N.A.	50		21.6	-158.11		24.3595		7.49551		0.0509537	13.321	1.09602		18.3277	64.4467	31.6157		24.695	34.997	1918.5	8.05939	Kaneoka Bay, Oahu, Hawaii
		M22			Kraussina rubra	N.A.	20		-34	24.95		26.2699		5.07054		0.0060392	6.68206	1.40219		46.6668	5.79039	4.08921		20.525	35.358	2009.1	8.07422	Jeffreys Bay, South Africa
		M12			Laqueus californianus	N.A.	20		33.73	-118.2		26.7166		11.0792		0.0246134	9.59036	1.26132		42.1025	111.404	9.16372		14.458	33.466	2077.1	7.81681	Off San Pedro, CA
		M08			Laqueus rubellus	99	100		36	135		26.859		5.69671		0.0240234	8.95307	1.12099		36.4761	28.2592	44.4471		12.982	34.318	2078.2	7.93054	Soyo-Maru St. 13
		M30			Laqueus rubellus	110	100		35.5	135.7		27.9308		5.35178		0.0104335	11.1551	1.28189		36.0583	29.1581	23.2773		12.982	34.318	2078.2	7.93054	Obama, Japan
		M13			Laqueus vancouveriensis	46	50		55.3	-131.65		26.6438		5.93393		0.0203909	6.19167	1.14988		45.1146	27.4944	12.6893		7.601	32.335	2048.7	7.6105	Ketchikan, Alaska
		M33			Macandrevia cranium	N.A.	100		70.56	25.57		26.4762		5.91439		0.00658965	10.3362	1.21006		46.2501	34.0503	14.631		4.557	34.702	2157.8	7.93253	Finmark, Norway
		M03			Magellania flavescens	N.A.	30		-39.24	144.77		26.4746		6.68383		bdl	9.54657	1.39484		32.1035	27.9021	13.4594		14.989	35.43	2019.9	8.04926	Victoria, Australia
		M03 dup			Magellania flavescens	N.A.	30		-39.24	144.77		27.1402		7.146		0.060481	8.19735	1.2801		21.856	21.6012	14.7971		14.989	35.43	2019.9	8.04926	Victoria, Australia
		M25			Megerlia truncata	N.A.	20		36.5	13.1		26.6192		14.9392		0.0374304	13.2511	1.07636		33.647	1146.18	22.0629		18.607	37.604	2090.4	8.12532	Sciacca, Sicily, Italy
		M01			Terebratalia transversa	55	50		36.8007	-121.947		26.6587		6.80693		0.0278978	6.20409	1.22703		29.9931	14.6006	13.0317		10.897	33.44	2036.8	7.86666	Monterey Co., CA, USA
		M02			Terebratalia transversa	N.A.	30		30.3	-116.3		27.0321		6.59529		0.0336778	8.54033	1.25964		28.2983	41.0172	6.25709		15.858	33.509	1972.5	7.86493	Baja California, MX
		M02 dup			Terebratalia transversa	N.A.	30		30.3	-116.3		26.5003		6.33571		0.101204	9.27198	1.24615		38.4882	51.3606	7.43706		15.858	33.509	1972.5	7.86493	Baja California, MX
		M11			Terebratalia transversa	N.A.	50		54.8	-133.5		25.9646		6.30199		0.0105014	5.94304	1.20589		44.0865	32.8321	9.78581		7.949	32.269	2033.7	7.69636	Forrester Island, Alaska
		M16			Terebratalia transversa	N.A.	100		47.7	-122.5		26.082		5.79338		0.0578136	6.13026	1.255		47.5962	7.39241	14.8371		8.291	33.431	2153.2	7.66771	Puget Sound, Washington
		M16 dup			Terebratalia transversa	N.A.	100		47.7	-122.5		26.7329		5.99693		0.0543082	6.19584	1.26913		47.0517	14.3529	15.2606		8.291	33.431	2153.2	7.66771	Puget Sound, Washington
		M26			Terebratalia transversa	N.A.	0		-42.9	-64.3		27.8169		5.90857		0.00231031	9.22362	1.17932		38.2741	22.2335	7.46659		13.234	33.56	2012.2	8.01892	Beach Shells - Punta Niñas, Golfo Nuevo, Chubut Prov., Argentina
		M26 dup			Terebratalia transversa	N.A.	0		-42.9	-64.3		27.9073		3.03927		0.0244788	9.28818	1.26494		38.1743	28.8092	6.66292		13.234	33.56	2012.2	8.01892	Beach Shells - Punta Niñas, Golfo Nuevo, Chubut Prov., Argentina
		M05			Terebratela rubicunda	N.A.	10		32.3	-64.8		26.392		6.91485		bdl	7.54482	1.35742		26.2946	bdl	17.6027		22.863	36.5	2019.4	8.07771	North Berumuda
		M19			Terebratela rubicunda	N.A.	100		-43.5	173.5		27.5161		14.2119		0.0772267	7.09283	1.12114		33.9724	298.823	7.78128		10.703	34.692	2058	8.10801	New Zealand
				Terebratulidina
		M21			Dolichozygus stearnsii	N.A.	100		33.5	133.5		26.7034		6.11276		0.071048	7.99323	0.889945		17.7408	20.9412	4.81955		17.562	34.646	2043.1	7.85104	Tosa, Japan
		M29			Terebratulina kiiensis	N.A.	50		33.8	-118.4		27.0488		5.84681		0.267745	11.9951	1.20654		40.6927	18.702	1.20744		11.845	33.471	2077.1	7.81681	Redondo Beach, CA
		M06			Terebratulina maxillata	N.A.	30		54	1		27.1336		8.19711		0.310186	7.08483	1.24505		39.8788	33.6475	3.90125		9.238	34.742	2097.8	7.97233	England
		M15			Terebratulina retusa	27	30		55.8	-5.9		25.6391		14.4008		0.141186	14.2976	1.32071		44.3283	81.2048	16.596		11.054	35.229	2087.1	8.02612	Sound of Jura
		M04			Terebratulina sp.	N.A.	100		-33.3	132.7		25.4279		6.71177		0.524014	9.93194	1.24773		24.61	38.5153	7.24261		16.211	35.001	2062.2	8.11017	South Australia
		M10			Terebratulina unguicula	91 to 137	100		55.5	-133.2		26.9017		6.11968		0.980216	10.4007	1.22234		48.579	149.3	3.0288		6.677	32.786	2099.9 to 2140.1	7.69995	Craig, Alaska
		M20			Tichosina bartletti	183	200		27.6	-82.8		28.6702		6.0122		0.014656	4.53336	0.669044		8.60397	16.5639	2.24347		15.068	35.974	2128	7.96321	Southwest of Egmont Key, Florida
		M20 dup			Tichosina bartletti	183	200		27.6	-82.8		28.4212		6.04315		0.0318366	4.63125	0.683045		8.37268	22.7717	2.4984		15.068	35.974	2128	7.96321	Southwest of Egmont Key, Florida
	Primary Shell Layer
			Terebratulida
				Terebratellidina
		M18 1'			Calloria inconspicua	N.A.	100		-36.5	173.5		23.4294		10.1924		bdl	111.324	1.57949		bdl	71.7768	20.0631		15.209	35.31	2042.2	8.10832	New Zealand
		M27 1'			Dallinella occidentalis	65 to 75	75		33.26	-118.5		17.193		bdl		bdl	bdl	bdl		bdl	bdl	bdl		10.292	33.584	2077.1	7.81681	Dredged off Catalina Island, CA
		M22 1'			Kraussina rubra	N.A.	20		-34	24.95		26.0085		6.25677		0.384209	85.3848	1.91976		47.1	240.648	57.1014		20.525	35.358	2009.1	8.07422	Jeffreys Bay, South Africa
		M30 1'			Laqueus rubellus	110	100		35.5	135.7		22.5617		2.05806		0.224196	33.6368	1.93696		49.2616	219.164	175.198		12.982	34.318	2078.2	7.93054	Obama, Japan
		M13 1'			Laqueus vancouveriensis	46	50		55.3	-131.65		16.9593		7.98616		2.17191	105.155	1.67916		122.135	1319.69	419.716		7.601	32.335	2048.7	7.6105	Ketchikan, Alaska
		M01 1'			Terebratalia transversa	55	50		36.8007	-121.947		25.811		10.0065		0.818532	96.9096	1.51789		42.764	105.908	33.6087		10.897	33.44	2036.8	7.86666	Monterey Co., CA, USA
		M11 1'			Terebratalia transversa	N.A.	50		54.8	-133.5		18.4788		4.93006		0.577186	79.2735	1.6804		99.1497	235.94	150.575		7.949	32.269	2033.7	7.69636	Forrester Island, Alaska
		M26 1'			Terebratalia transversa	N.A.	0		-42.9	-64.3		19.8757		2.0423		0.834384	42.744	2.48821		74.0706	15997	68.3683		13.234	33.56	2012.2	8.01892	Beach Shells - Punta Niñas, Golfo Nuevo, Chubut Prov., Argentina
				Terebratulidina
		M06 1'			Terebratulina maxillata	N.A.	30		54	1		24.6279		1.26089		bdl	bdl	1.89488		bdl	162.221	141.859		9.238	34.742	2097.8	7.97233	England
		Note: Specimens are stored at USC Department of Earth Sciences
		*Depths used to estimate Temperature, Salinity, pH, and [DIC]. In cases when sampling depth data are not available, depths were estimated using a boating map.
		†N.A. = Data not available
		§ bdl = Below Detection Limit

## Sheet: G47558
Washington, K.E., et al., 2020, Lithium isotope composition of modern and fossilized Cenozoic brachiopods: Geology, v. 48, https://doi.org/10.1130/G47558.1
